1 **Short research article**

2 **Identification of *bla*<sub>GIM-1</sub> in *Acinetobacter variabilis* isolated from the hospital**  
3 **environment in Tamil Nadu, India**

4 **<sup>1</sup>Prasanth Manohar, <sup>1</sup>Murugavel Ragavi, <sup>1</sup>Ashby Augustine, <sup>1</sup>Hrishikesh MV,**  
5 **<sup>1</sup>Nachimuthu Ramesh\***

6 <sup>1</sup>Antibiotic Resistance and Phage Therapy Laboratory, School of Bioscience and Technology,  
7 Vellore Institute of Technology (VIT), Vellore, Tamil Nadu, India.

8 \*For Correspondence:

9 Dr. N. Ramesh, [drpnramesh@gmail.com](mailto:drpnramesh@gmail.com), +91 9842660673

10 **Abstract**

11 **Background:** Emergence of carbapenem resistance mechanisms among Gram-negative  
12 bacteria is a worrisome health problem. Here, we focused on to identify the presence of  
13 carbapenem-resistant bacteria among the samples collected from hospital environments in  
14 Tamil Nadu. **Methods:** A total of 30 hospital environmental samples were collected between  
15 August 2017 and January 2018 from hospitals located in Chennai and Vellore such as lift  
16 switches, stair rails, switchboards, nursing desks, used nursing gloves, door handles,  
17 wheelchairs, touch screens, chairs and from pillars inside the hospitals. **Results and**  
18 **discussion:** A total of 22 carbapenem-resistant Gram-negative bacteria were isolated that  
19 included *Escherichia coli*, *Klebsiella* sp., *Enterobacter* sp., *Salmonella* sp., *Pseudomonas*  
20 *aeruginosa* and *Acinetobacter* sp. Interestingly, *bla*<sub>GIM-1</sub> was detected in *Acinetobacter*  
21 *variabilis* strain isolated in samples collected from hospitals. Unlike other studies, the  
22 identified GIM-1 was not plasmid encoded, and this is the first report for the presence of  
23 GIM-1 (German imipenemase) in India. **Conclusion:** Extensive surveillance programs are  
24 necessary to trace the uncontrolled spread of carbapenem-resistance genes in order to reduce  
25 the rapid spread of resistance.

26 **Keywords:** *Acinetobacter* species, *bla*<sub>GIM-1</sub>, carbapenem resistance, Gram-negative bacteria,  
27 German imipenemase.

28 **Introduction**

29 Antibiotic resistance has become one of the major clinical and public health concerns [1].  
30 The spread of antibiotic resistance in clinical settings (nosocomial infections) is a well-

31 recognized problem, and this becomes overlooked with great importance [1]. Multidrug-  
32 resistant bacteria (MDR) are spreading at an uncontrolled rate, especially in hospital areas  
33 [2]. In recent years, it is found that there is a prevalence of a large population of multi-drug  
34 resistant bacteria in and around the hospital environment [1]. These are bacteria which are  
35 exposed to a variety of antibiotics and simultaneously becoming resistant, which makes a  
36 major threat to the public health [3]. Carbapenem is a subgroup in beta-lactam antibiotics  
37 which is considered as one of the last hope for the threatening multi-drug resistant bacterial  
38 infections [4,5]. But developing carbapenem-resistant Gram-negative bacteria is one of the  
39 serious concerns. More dangerously, an MDR bacterium having one or more beta-lactamase  
40 genes can involve in horizontal transfer of resistance genes to other bacterial species or  
41 strains [6]. Some of the prevalent carbapenem-resistance genes in India are; New Delhi  
42 Metallo-beta-lactamase (NDM), Imipenemase (IMP), Verona Integron-Mediated metallo-  
43 beta-lactamase (VIM), Oxacillinase (OXA) [7]. In another study, the identification of DIM-1  
44 gene in *Pseudomonas aeruginosa* was reported for the first time in India by our group [8].  
45 Antibiotic resistance surveillance programs in hospitals are essential to monitor and control  
46 the spread of antibiotic-resistant infections (nosocomial). Community-associated or  
47 community onset of carbapenem-resistant bacterial infections is reported to have a prevalence  
48 of 0-30% [9]. The main focus of this study is to identify the presence of carbapenem-resistant  
49 bacteria from samples collected in the hospital environment.

## 50 ***Methods***

51 In the present study, a total of 30 samples were collected from in and around hospitals in  
52 Chennai and Vellore, Tamil Nadu during the period between August 2017 and August 2018.  
53 The samples were taken from lift switches, stair rails, switchboards, nursing desks, used  
54 nursing gloves, door handles, wheelchairs, touch screens, chairs and pillars inside the  
55 hospital. Sterile swabs dipped in sterile tryptone broth were used for sample collection, and  
56 collected samples were immediately transported and processed at Antibiotic Resistance and  
57 Phage Therapy Laboratory, VIT, Vellore. Bacterial isolation was carried out using the spread  
58 plate technique using MacConkey agar M081 (Himedia, India) amended with 8 µg/mL of  
59 meropenem. Minimal inhibitory concentration (MIC) was performed using micro-broth  
60 dilution method as per the CLSI guidelines. Modified Hodge test (MHT) was performed to  
61 evaluate the carbapenemase production as explained elsewhere [7]. Bacterial identification  
62 was carried out with the VITEK identification system (bioMerieux) and by 16S rRNA  
63 analysis using universal primers 27F and 1492R. DNA was isolated using a boiling lysis

64 method as explained elsewhere [7]. Further, molecular screening of beta-lactamase genes  
65 such as *bla*<sub>VIM</sub>, *bla*<sub>IMP</sub>, *bla*<sub>KPC</sub>, *bla*<sub>NDM</sub>, *bla*<sub>OXA-48</sub>, *bla*<sub>OXA-1</sub>, *bla*<sub>OXA-4</sub>, *bla*<sub>OXA-30</sub>, *bla*<sub>OXA-23</sub>,  
66 *bla*<sub>OXA-24</sub>, *bla*<sub>OXA-51</sub>, *bla*<sub>OXA-58</sub>, *bla*<sub>AIM</sub>, *bla*<sub>GIM</sub>, *bla*<sub>DIM</sub>, *bla*<sub>SIM</sub>, *bla*<sub>BIC</sub> and *bla*<sub>GES</sub> were  
67 performed using multiplex PCR using the primers and PCR conditions as explained earlier [7,  
68 8]. Plasmid DNA was isolated (only for the isolates that were identified to harbour resistance  
69 genes) using HiPurA Plasmid DNA Miniprep Purification kit (Himedia, India). All the PCR  
70 products were sequenced (Eurofins Genomics India Pvt. Ltd., Bangalore) and sequence  
71 results were analysed against available BLASTN sequences and deposited in Genbank.

## 72 **Results**

73 A total of 22 non-repetitive, carbapenem-resistant, Gram-negative bacteria were isolated from  
74 30 samples collected from hospital environments. Of the 22 carbapenem-resistant isolates, 15  
75 were identified as lactose fermenters, and 7 were non-fermenters. The isolates were identified  
76 as *E. coli* (n=7), *Klebsiella* species (n=4), *Enterobacter* species (n=4), *Salmonella* species  
77 (n=2), *Acinetobacter* species (n=2) and *Pseudomonas aeruginosa* (n=3). The MIC results for  
78 meropenem/ imipenem were ranged between 4 µg/mL and >128 µg/mL (Table 1). None of  
79 the isolates was found to be positive for carbapenemase production by MHT. Molecular  
80 characterization results showed the presence of a *bla*<sub>GIM</sub> gene in *Acinetobacter variabilis*.  
81 Genes *bla*<sub>VIM</sub>, *bla*<sub>IMP</sub>, *bla*<sub>KPC</sub>, *bla*<sub>NDM</sub>, *bla*<sub>OXA-48</sub>, *bla*<sub>OXA-1</sub>, *bla*<sub>OXA-4</sub>, *bla*<sub>OXA-30</sub>, *bla*<sub>OXA-23</sub>,  
82 *bla*<sub>OXA-24</sub>, *bla*<sub>OXA-51</sub>, *bla*<sub>OXA-58</sub>, *bla*<sub>AIM</sub>, *bla*<sub>DIM</sub>, *bla*<sub>SIM</sub>, *bla*<sub>BIC</sub> and *bla*<sub>GES</sub> were absent in all the  
83 isolates tested. Plasmid DNA was isolated from *Acinetobacter variabilis* and presence of  
84 ≈20kb plasmid was noted. Further screening for the presence of *bla*<sub>GIM</sub> gene using plasmid  
85 DNA confirmed that *bla*<sub>GIM</sub> gene was bound to chromosomal DNA, not in plasmid DNA.  
86 Sequencing results confirmed that the amplified *bla*<sub>GIM</sub> gene is *bla*<sub>GIM-1</sub>, and to the best of our  
87 knowledge this is a first report for the presence of *bla*<sub>GIM-1</sub> in India. [Accession number:  
88 MG764090]

89 **Table 1: Classification of resistance among the Gram-negative bacteria isolated from**  
90 **hospital environmental samples.**

| S. no. | Bacterial strain   | Imipenem<br>MIC (µg/mL) | Meropenem<br>MIC (µg/mL) | Resistance gene |
|--------|--------------------|-------------------------|--------------------------|-----------------|
| 1.     | <i>E. coli</i> EC1 | 8                       | 8                        | -               |
| 2.     | <i>E. coli</i> EC2 | 32                      | 16                       | -               |
| 3.     | <i>E. coli</i> EC3 | 8                       | 4                        | -               |

|     |                                     |      |      |              |
|-----|-------------------------------------|------|------|--------------|
| 4.  | <i>E. coli</i> EC4                  | 16   | 32   | -            |
| 5.  | <i>E. coli</i> EC5                  | 8    | 8    | -            |
| 6.  | <i>E. coli</i> EC6                  | 8    | 8    | -            |
| 7.  | <i>E. coli</i> EC7                  | 32   | 32   | -            |
| 8.  | <i>Klebsiella</i> sp. KP1           | 8    | 4    | -            |
| 9.  | <i>Klebsiella</i> sp. KP2           | 128  | 64   | -            |
| 10. | <i>Klebsiella</i> sp. KP3           | 32   | 16   | -            |
| 11. | <i>Klebsiella</i> sp. KP4           | 8    | 8    | -            |
| 12. | <i>Enterobacter</i> sp. EL1         | 32   | 64   | -            |
| 13. | <i>Enterobacter</i> sp. EL2         | 64   | 32   | -            |
| 14. | <i>Enterobacter</i> sp. EL3         | 32   | 32   | -            |
| 15. | <i>Enterobacter</i> sp. EL4         | 128  | >128 | -            |
| 16. | <i>Salmonella</i> sp. SL1           | 32   | 16   | -            |
| 17. | <i>Salmonella</i> sp. SL2           | 32   | 32   | -            |
| 18. | <i>Acinetobacter</i> sp. AB1        | 8    | 16   | -            |
| 19. | <i>Acinetobacter variabilis</i> AV1 | >128 | 32   | <b>GIM-1</b> |
| 20. | <i>Pseudomonas</i> sp. PA1          | 32   | 64   | -            |
| 21. | <i>Pseudomonas</i> sp. PA2          | 128  | >128 | -            |
| 22. | <i>Pseudomonas</i> sp. PA3          | >128 | >128 | -            |

## 91 **Discussion**

92 Carbapenem-resistance among Gram-negative bacteria is one of the increasing public health  
 93 concerns. Nosocomial infections are considered as one of the serious health care problems,  
 94 notably; the rapid spread of antibiotic-resistant bacterial infections is scary [10]. In India, the  
 95 prevalence of carbapenem-resistant bacteria is being reported and multi-drug resistant  
 96 bacterial infections are on the rise [7]. Importantly, this study reports the emergence of  
 97 carbapenem-resistant bacteria in the hospital environment and presence of GIM-1 gene in *A.*  
 98 *variabilis*. In the past, GIM (German Imipenemase)-type carbapenem-resistance gene was  
 99 reported in *P. aeruginosa* in 2002 and in common, the reports of GIM genes were from the  
 100 bacteria isolated in and around Germany. To the best of our knowledge, this is the first study  
 101 to report the emergence of GIM-1 from India or even from the Asian subcontinent. Earlier,  
 102 the presence of GIM-1 genes was reported to be encoded on plasmids, and also in mobile  
 103 genetic elements such as integrons [11]. This is one of the rarest studies to report the presence

104 of GIM-1 gene in *A. variabilis* isolated from environmental samples, and the resistance gene  
105 was bound to chromosomal DNA and not in a plasmid. It is very common to identify GIM-1-  
106 type carbapenem resistance mechanism in *Enterobacteriaceae* and *P. aeruginosa*, but the  
107 prevalence of GIM-type carbapenemases in *Acinetobacter* is very rare. The isolation of *A.*  
108 *variabilis* in India indicates that GIM-1 is no longer confined to one geographical region as  
109 previously thought and these are more widespread among other non-*Enterobacteriaceae*.  
110 This clearly indicates the potential transmission of GIM-1-type carbapenemase genes among  
111 other Gram-negative bacteria. The increasing prevalence of carbapenem-resistant Gram-  
112 negative bacteria (CR-GNB) in the hospital environment, causing nosocomial infections, is  
113 challenging particularly during the clinical recovery of patients. This study opens the door for  
114 the detection of new carbapenemase genes in India; therefore, extensive resistance  
115 surveillance is needed to learn more about the emergence of GIM-1-producing bacteria in  
116 India.

#### 117 **Ethical Statement:**

118 The ethical approval for this study was obtained from Institutional Biosafety Committee  
119 “Ref. No. VIT/IBSC/07/October, 2018”.

#### 120 **Conflict of Interest:**

121 The authors declare no conflict of interest.

#### 122 **Author’s contribution:**

123 PM designed the study and PM, MR, AA, H MV executed the study. PM analysed the data  
124 and validated the data. PM and MR wrote the manuscript draft. NR confirmed the research  
125 data and NR finalized the manuscript.

#### 126 **References**

- 127 1. Moges F, Endris M, Belyhun Y, Worku W. Isolation and characterization of multiple  
128 drug resistance bacterial pathogens from waste water in hospital and non-hospital  
129 environments, Northwest Ethiopia. BMC Res Notes. 2014; 7:215.
- 130 2. Dijkshoorn L, Namec A, Seifert H. An increasing threat in hospitals: Multidrug-  
131 resistant *Acinetobacter baumannii*. Nat Rev Microbiol. 2007; 939-951
- 132 3. van Duin D, Paterson D. Multidrug Resistant Bacteria in the Community: Trends and  
133 Lessons Learned. Infect Dis Clin North Am. 2016; 30(2): 377–390.

- 134 4. Ramesh N, Prasanth M, Ramkumar S, Suresh M, Tamhankar AJ, Gothandam K.M et  
135 al. Colistin susceptibility of gram-negative clinical isolates from Tamil Nadu, India.  
136 Asian Biomed. 2016; 10(1): 35 – 39
- 137 5. Thomson JM, Bonomo RA. The threat of antibiotic resistance in Gram-negative  
138 pathogenic bacteria:  $\beta$ -lactams in peril!. Curr Opin Microbiol. 2005 8(5): 518-524
- 139 6. van Hoek AH, Mevius D, Guerra B, Mullany P, Roberts AP, Aarts HJ. Acquired  
140 Antibiotic Resistance Genes: An Overview. Front Microbiol. 2011; 2: 203.
- 141 7. Manohar P, Shanthini T, Ayyanar R, Bozdogan B, Wilson A, Tamhankar AJ, et al.  
142 The distribution of carbapenem-and colistin-resistance in Gram-negative bacteria  
143 from the Tamil Nadu region in India. J Med Microbiol. 2017; 66(7):874-83.
- 144 8. Manohar P, Babu S, Bozdogan B, Ramesh N. Identification of blaDIM-1 metallo- $\beta$ -  
145 lactamase gene in *Pseudomonas aeruginosa* isolated from Tamil Nadu, India. J Global  
146 Antimicrob Resist. 2018;13:7-8.
- 147 9. Weingarten RA, Johnson RC, Conlan S, Ramsburg AM, Dekker JP, Lau AF, Khil P,  
148 Odom RT, Deming C, Park M, Thomas PJ. Genomic analysis of hospital plumbing  
149 reveals diverse reservoir of bacterial plasmids conferring carbapenem resistance.  
150 MBio. 2018;9(1):e02011-17.
- 151 10. Wang Q, Zhang Y, Yao X, Xian H, Liu Y, Li H et al. Risk factors and clinical  
152 outcomes for carbapenem-resistant *Enterobacteriaceae* nosocomial infections. Eur J  
153 Clin Microbiol Infect Dis. 2016; 35(10):1679-89.
- 154 11. Kaase M, Szabados F, Pfennigwerth N, Anders A, Geis G, Pranada AB. Description  
155 of the metallo- $\beta$ -lactamase GIM-1 in *Acinetobacter pittii*. J Antimicrob Chemother.  
156 2013; 69(1):81-4.
